# Supplementary material for: Association between ambient temperature and hypertensive disorders in pregnancy in China
Source: PubMed Central journal article supplement (PMC7286884; doi:10.1038/s41467-020-16775-8), 2020-06-10
Supplement: 41467_2020_16775_MOESM1_ESM.pdf [file 41467_2020_16775_MOESM1_ESM.pdf]

## **Supplementary Information**

**Title:** Association between ambient temperature and hypertensive disorders in pregnancy in China

**Authors:** Xiong et al.

### **Included Files**

Supplementary Fig. 1-16

Supplementary Table 1

Supplementary Figures

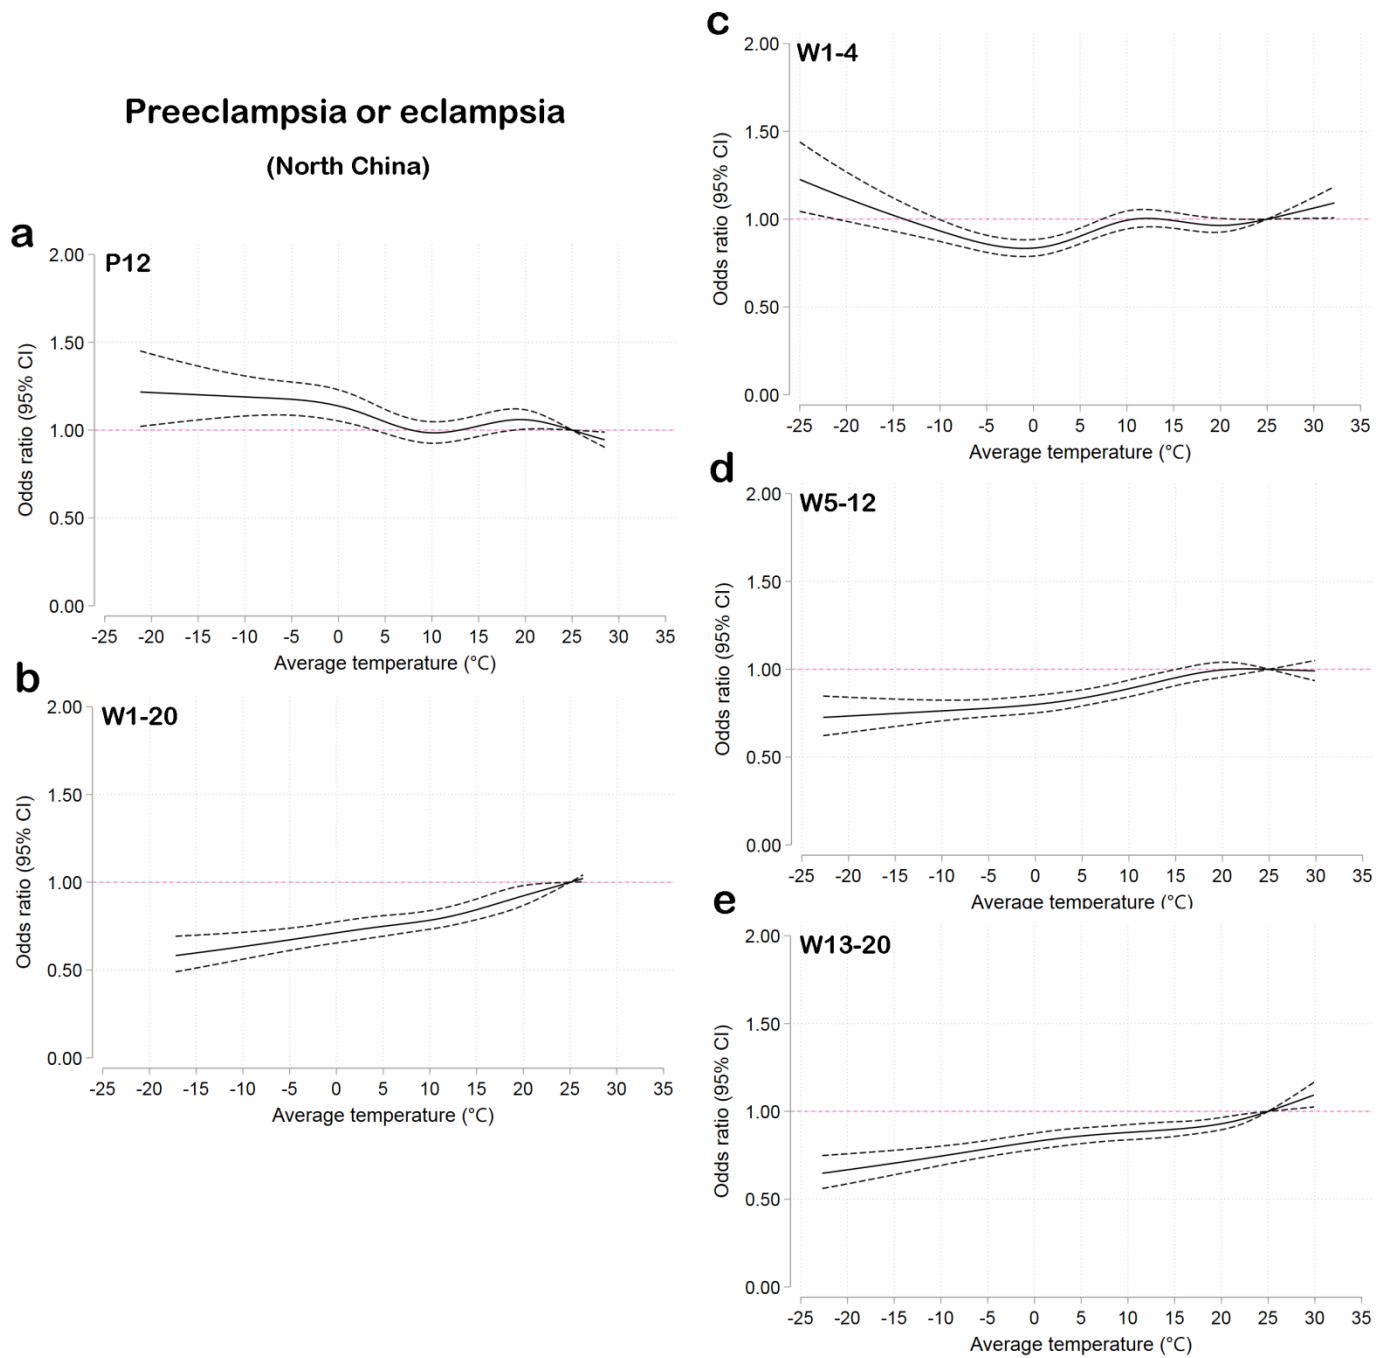

**Supplementary Fig. 1** Curves for average temperature and preeclampsia or eclampsia in North China. Solid black lines corresponding to points estimate of aORs of preeclampsia or eclampsia; dashed black lines correspond to 95% confidence intervals. **(a)** 12 weeks preconception; **(b)** 1-20 weeks postconception; **(c)** 1-4 weeks postconception; **(d)** 5-12 weeks postconception; **(e)** 13-20 weeks postconception. Abbreviations: P, preconception; W, weeks postconception. Source data are provided as a Source Data file.

**Preeclampsia or eclampsia  
(South China)**

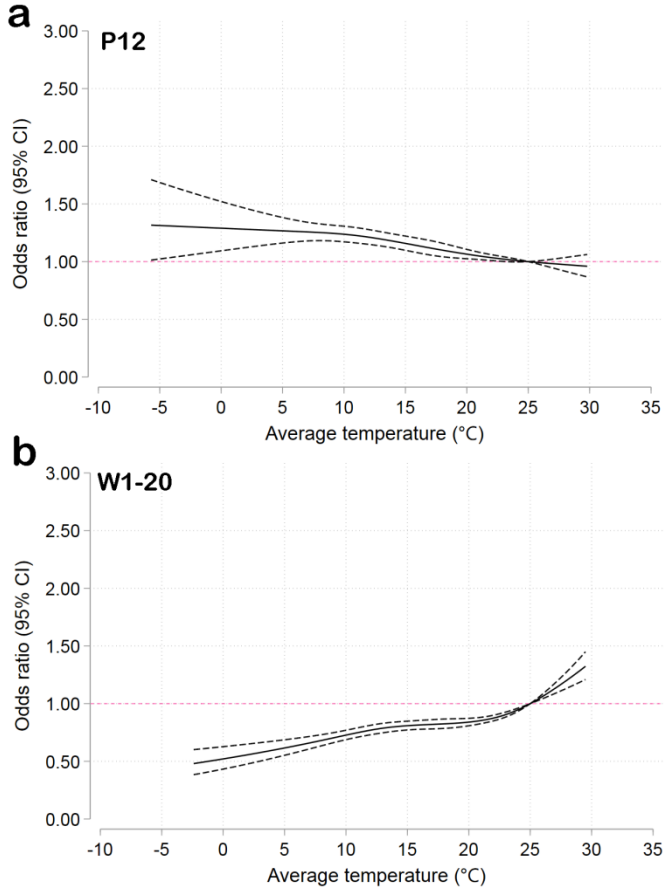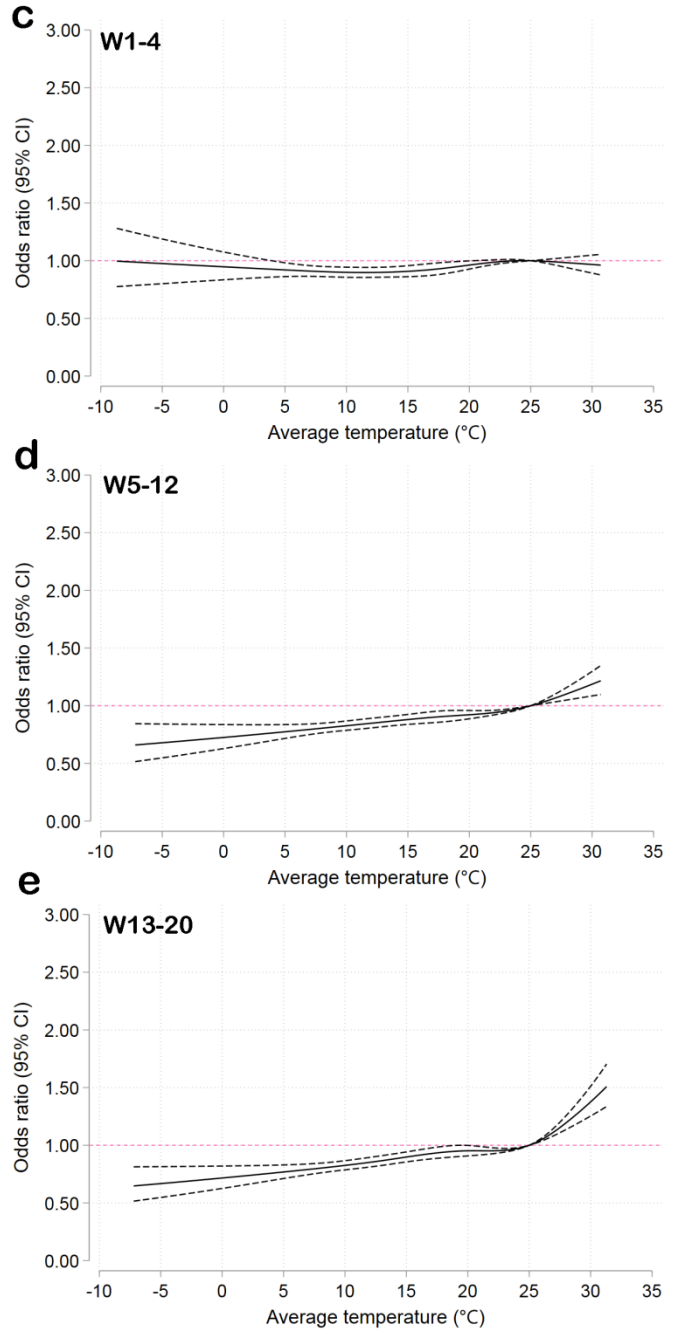

**Supplementary Fig. 2** Curves for average temperature and preeclampsia or eclampsia in South China. Solid black lines corresponding to points estimate of aORs of preeclampsia or eclampsia; dashed black lines correspond to 95% confidence intervals. **(a)** 12 weeks preconception; **(b)** 1-20 weeks postconception; **(c)** 1-4 weeks postconception; **(d)** 5-12 weeks postconception; **(e)** 13-20 weeks postconception. Abbreviations: P, preconception; W, weeks postconception. Source data are provided as a Source Data file.

## Gestational hypertension (North China)

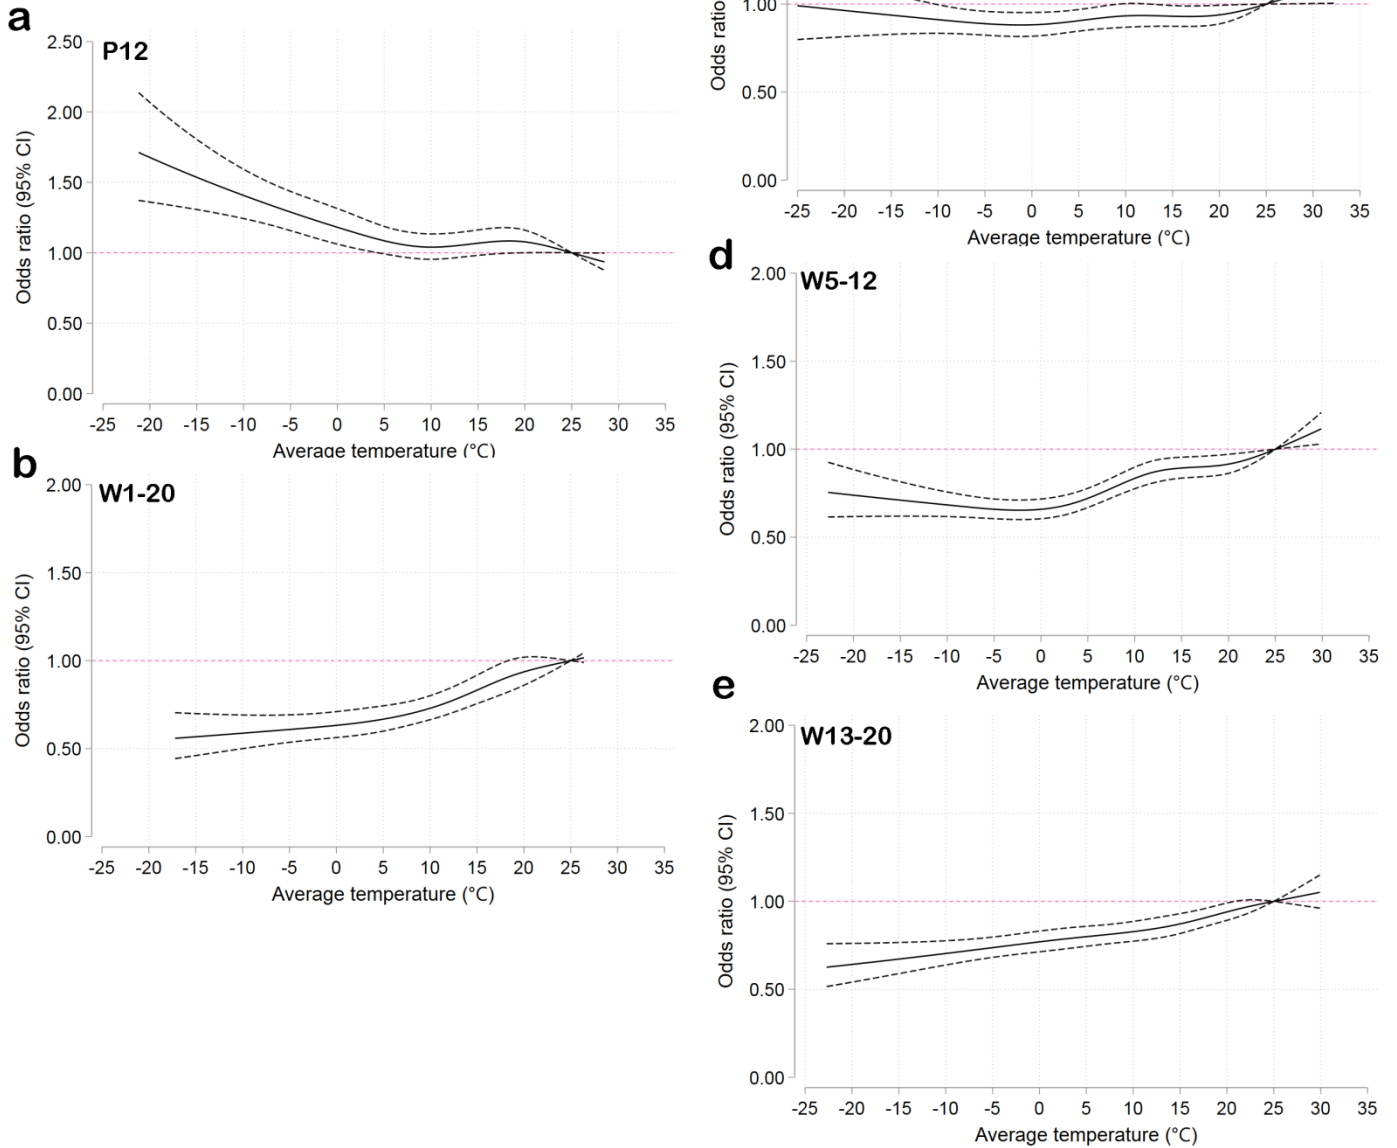

**Supplementary Fig. 3** Curves for average temperature and gestational hypertension in North China. Solid black lines correspond to points estimate of aORs of gestational hypertension; dashed black lines correspond to 95% confidence intervals. **(a)** 12 weeks preconception; **(b)** 1-20 weeks postconception; **(c)** 1-4 weeks postconception; **(d)** 5-12 weeks postconception; **(e)** 13-20 weeks postconception. Abbreviations: P, preconception; W, weeks postconception. Source data are provided as a Source Data file.

## Gestational hypertension (South China)

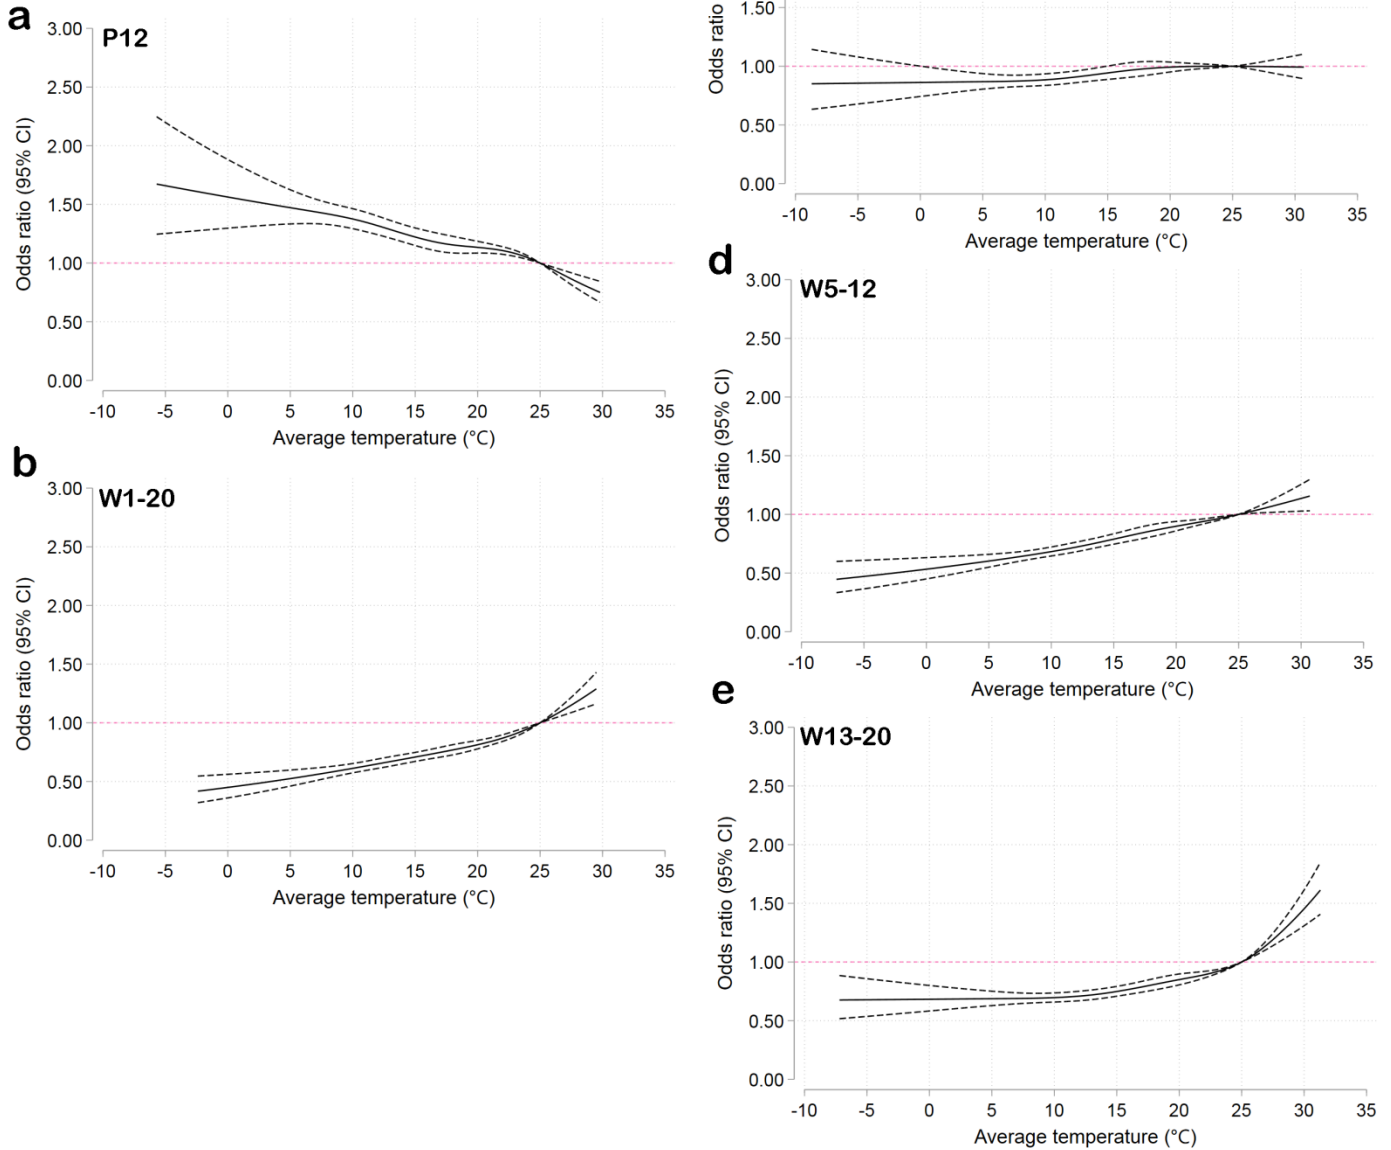

**Supplementary Fig. 4** Curves for average temperature and gestational hypertension in South China. Solid black lines correspond to points estimate of aORs of gestational hypertension; dashed black lines correspond to 95% confidence intervals. **(a)** 12 weeks preconception; **(b)** 1-20 weeks postconception; **(c)** 1-4 weeks postconception; **(d)** 5-12 weeks postconception; **(e)** 13-20 weeks postconception. Abbreviations: P, preconception; W, weeks postconception. Source data are provided as a Source Data file.

**Superimposed preeclampsia  
(North China)**

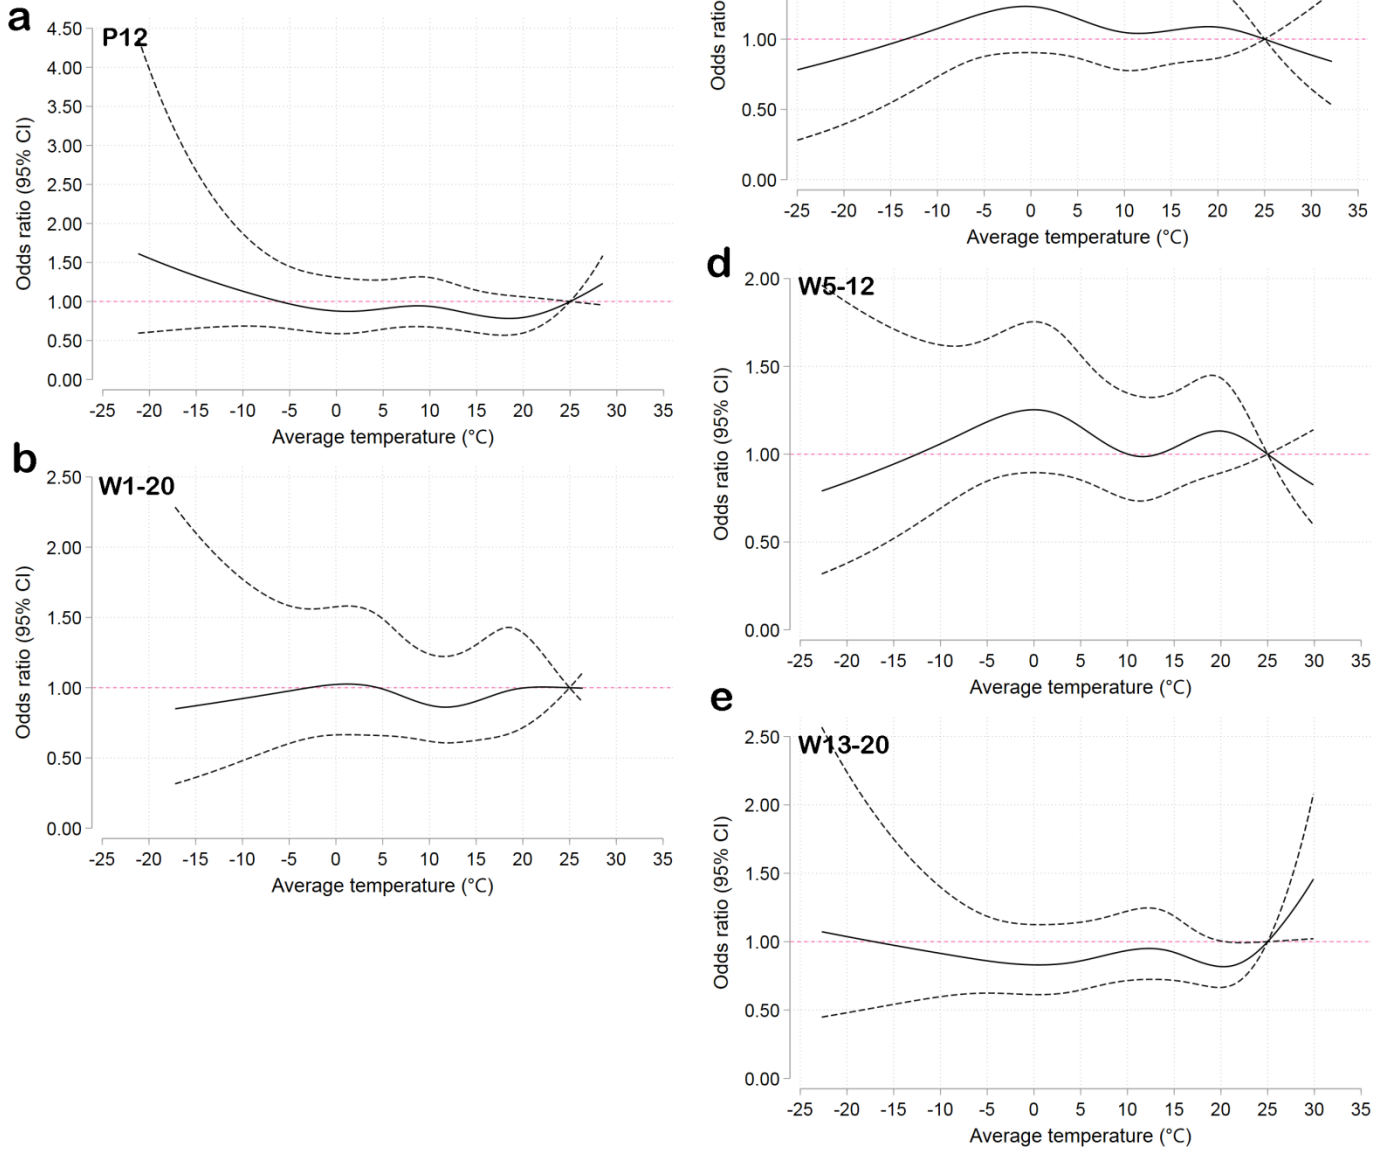

**Supplementary Fig. 5** Curves for average temperature and superimposed preeclampsia in North China. Solid black lines correspond to points estimate of aORs of superimposed preeclampsia; dashed black lines correspond to 95% confidence intervals. **(a)** 12 weeks preconception; **(b)** 1-20 weeks postconception; **(c)** 1-4 weeks postconception; **(d)** 5-12 weeks postconception; **(e)** 13-20 weeks postconception. Abbreviations: P, preconception; W, weeks postconception. Source data are provided as a Source Data file.

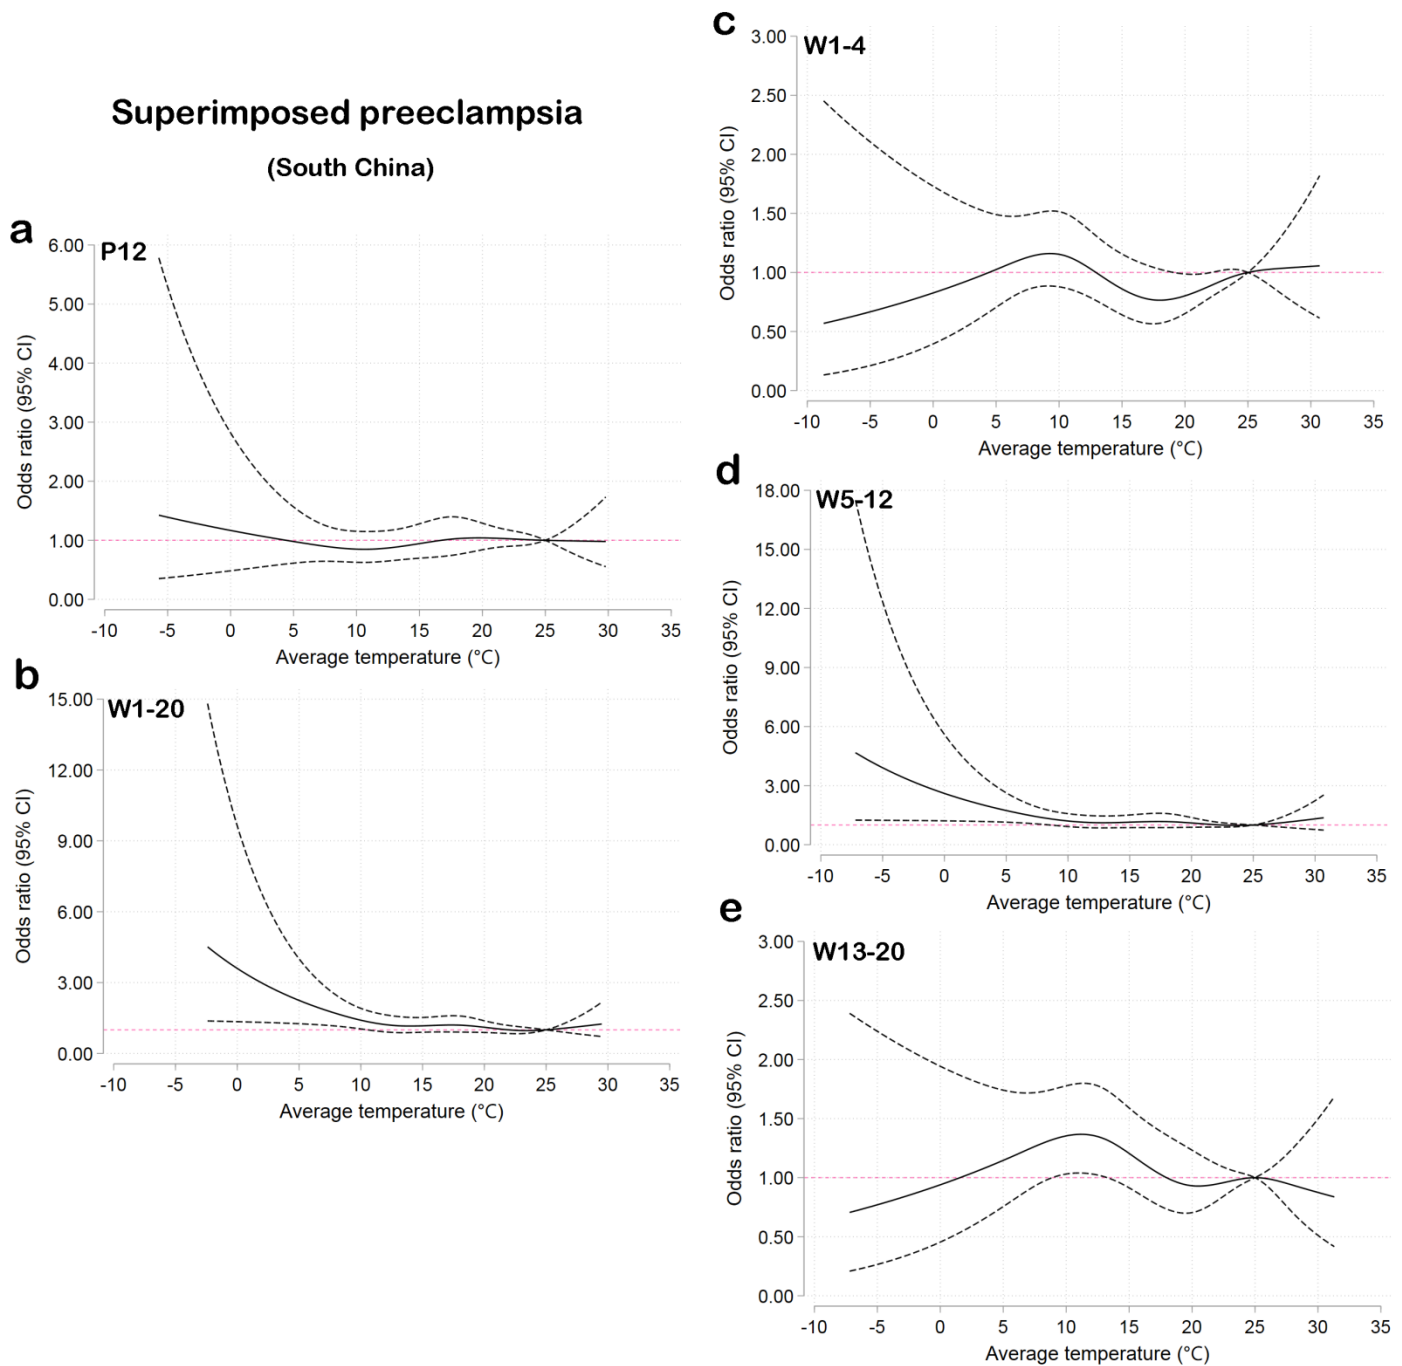

**Supplementary Fig. 6** Curves for average temperature and superimposed preeclampsia in South China. Solid black lines correspond to points estimate of aORs of superimposed preeclampsia; dashed black lines correspond to 95% confidence intervals. **(a)** 12 weeks preconception; **(b)** 1-20 weeks postconception; **(c)** 1-4 weeks postconception; **(d)** 5-12 weeks postconception; **(e)** 13-20 weeks postconception. Abbreviations: P, preconception; W, weeks postconception. Source data are provided as a Source Data file.

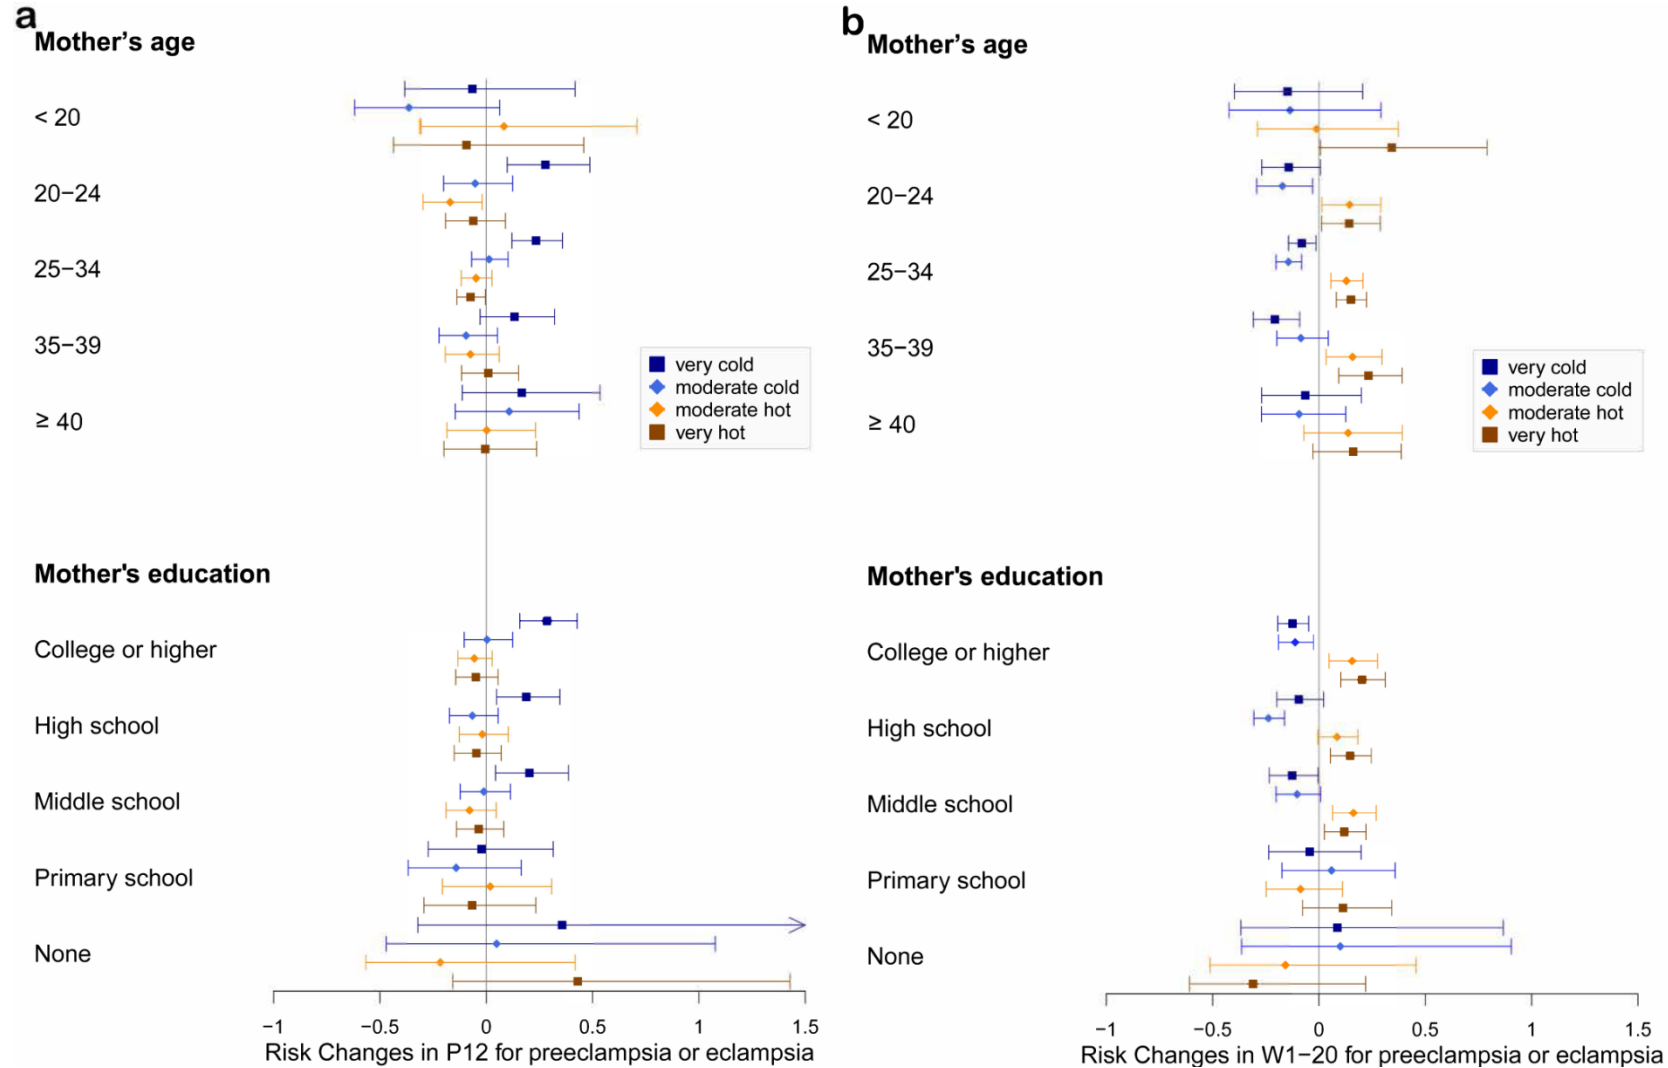

**Supplementary Fig. 7** Risk change in preeclampsia or eclampsia to extreme temperature by maternal mother's age and education level. **(a)** 12 weeks preconception; **(b)** the first half of pregnancy. Data are presented as change in aORs with 95% confidence intervals. Error bars correspond to 95% confidence intervals, centre for the error bars correspond to point estimates of change in aORs. Source data are provided as a Source Data file.



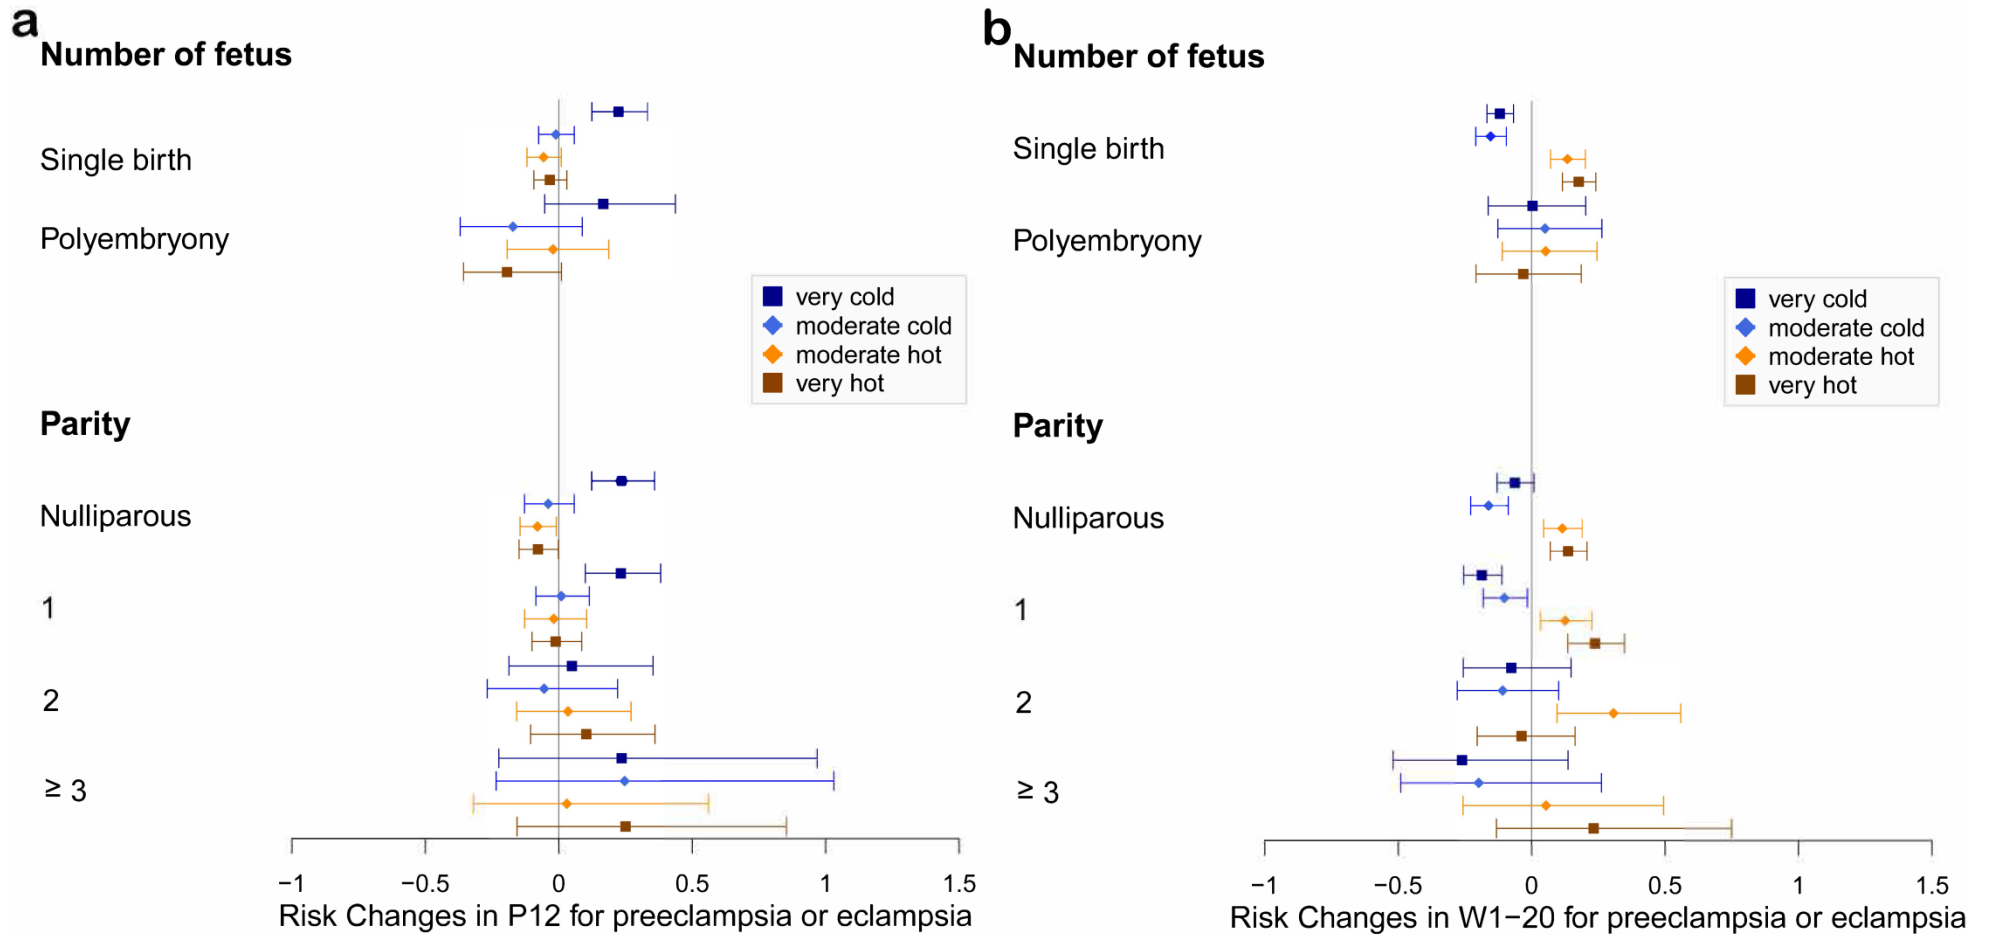

**Supplementary Fig. 8** Risk change in preeclampsia or eclampsia to extreme temperature by number of fetuses and parity. **(a)** 12 weeks preconception; **(b)** the first half of pregnancy. Data are presented as change in aORs with 95% confidence intervals. Error bars correspond to 95% confidence intervals, centre for the error bars correspond to point estimates of change in aORs. Source data are provided as a Source Data file.

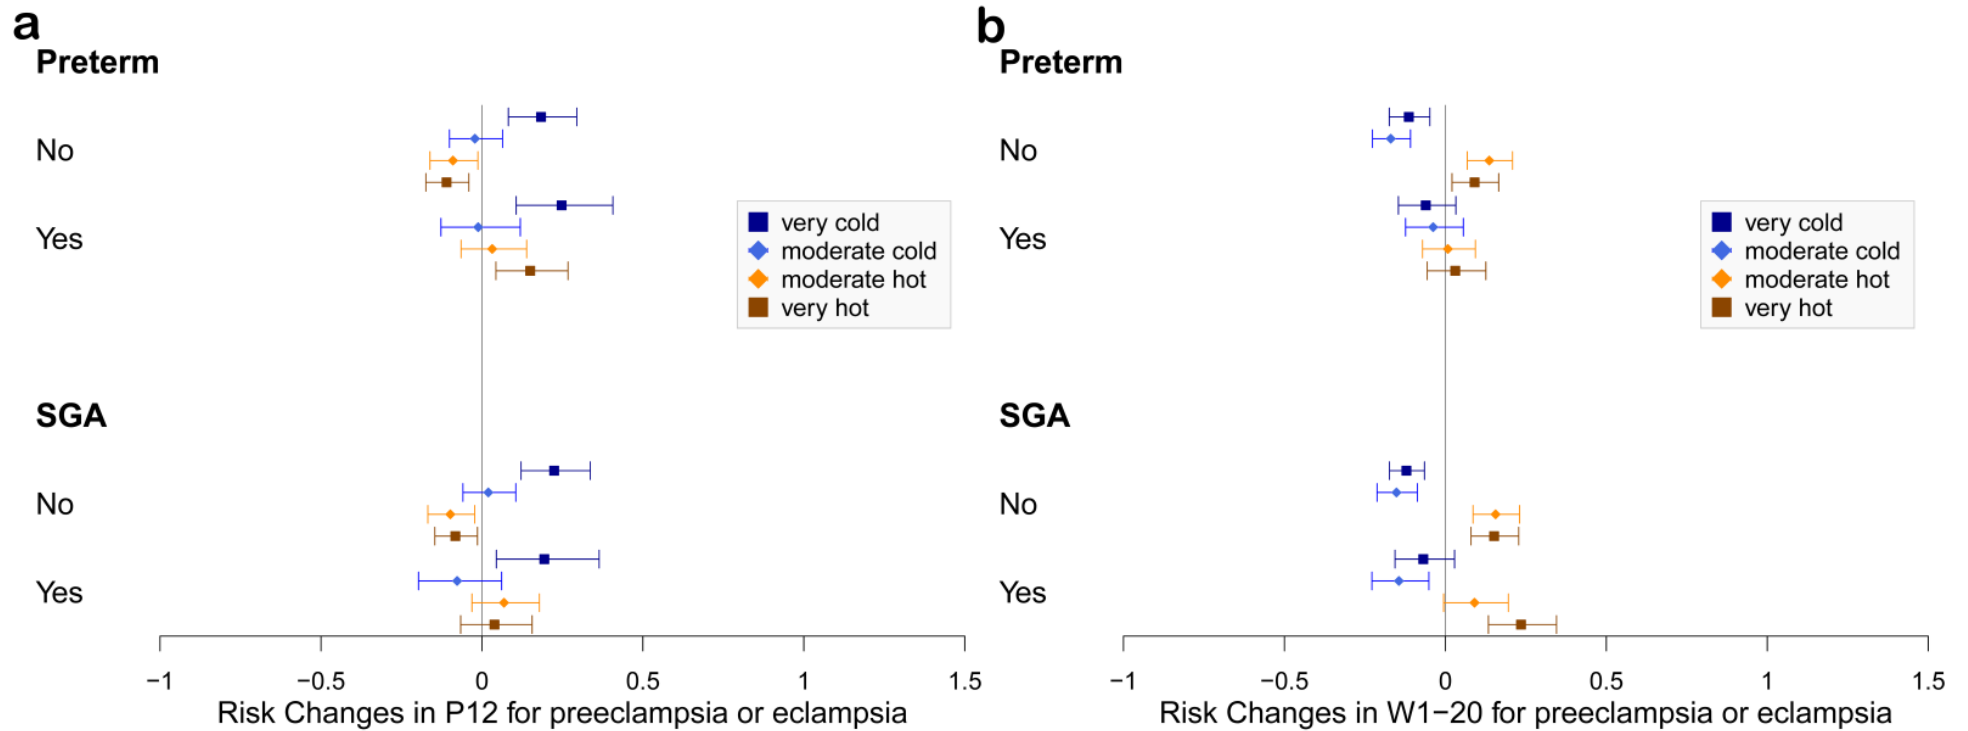

**Supplementary Fig. 9** Risk change in preeclampsia or eclampsia to extreme temperature by preterm and small for gestational age infants. **(a)** 12 weeks preconception; **(b)** the first half of pregnancy. SGA: small for gestational age. Data are presented as change in aORs with 95% confidence intervals. Error bars correspond to 95% confidence intervals, centre for the error bars correspond to point estimates of change in aORs. Source data are provided as a Source Data file.

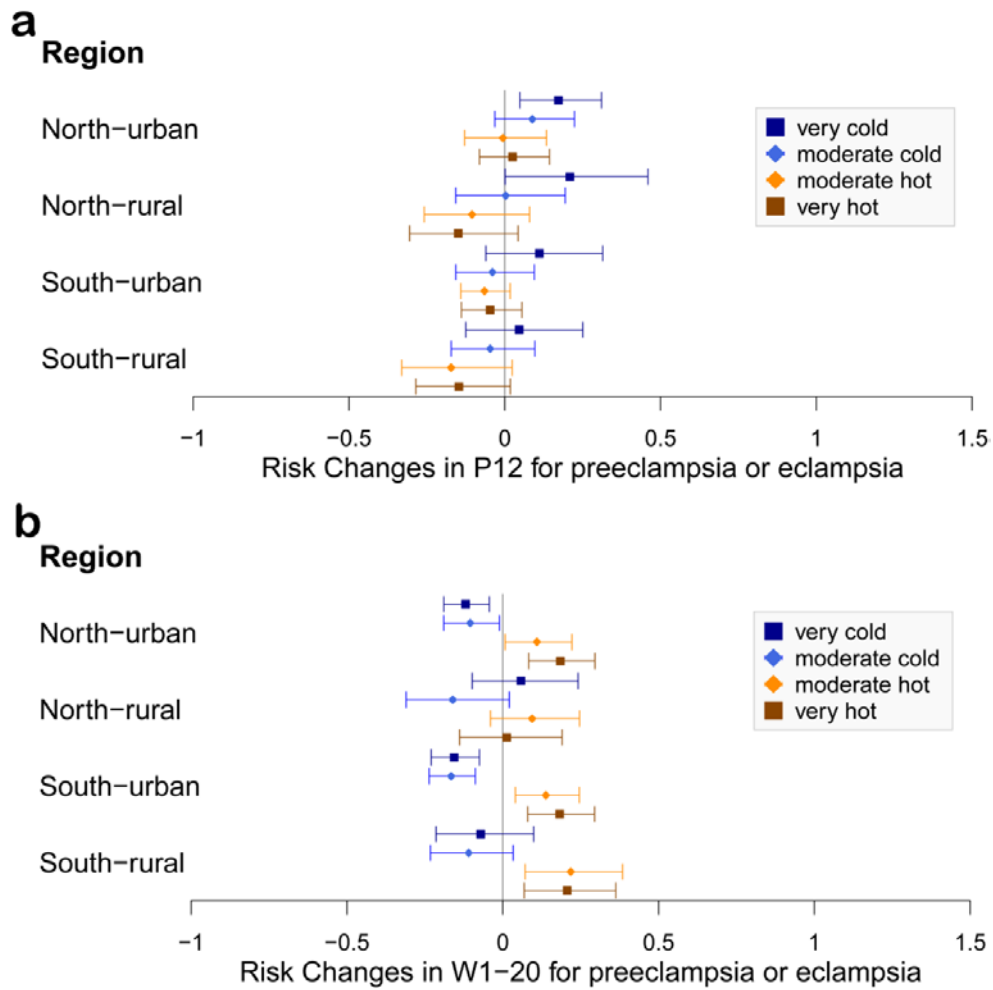

**Supplementary Fig. 10** Risk change in preeclampsia or eclampsia to extreme temperature by region. **(a)** 12 weeks preconception; **(b)** the first half of pregnancy. Data are presented as change in aORs with 95% confidence intervals. Error bars correspond to 95% confidence intervals, centre for the error bars correspond to point estimates of change in aORs. Source data are provided as a Source Data file.

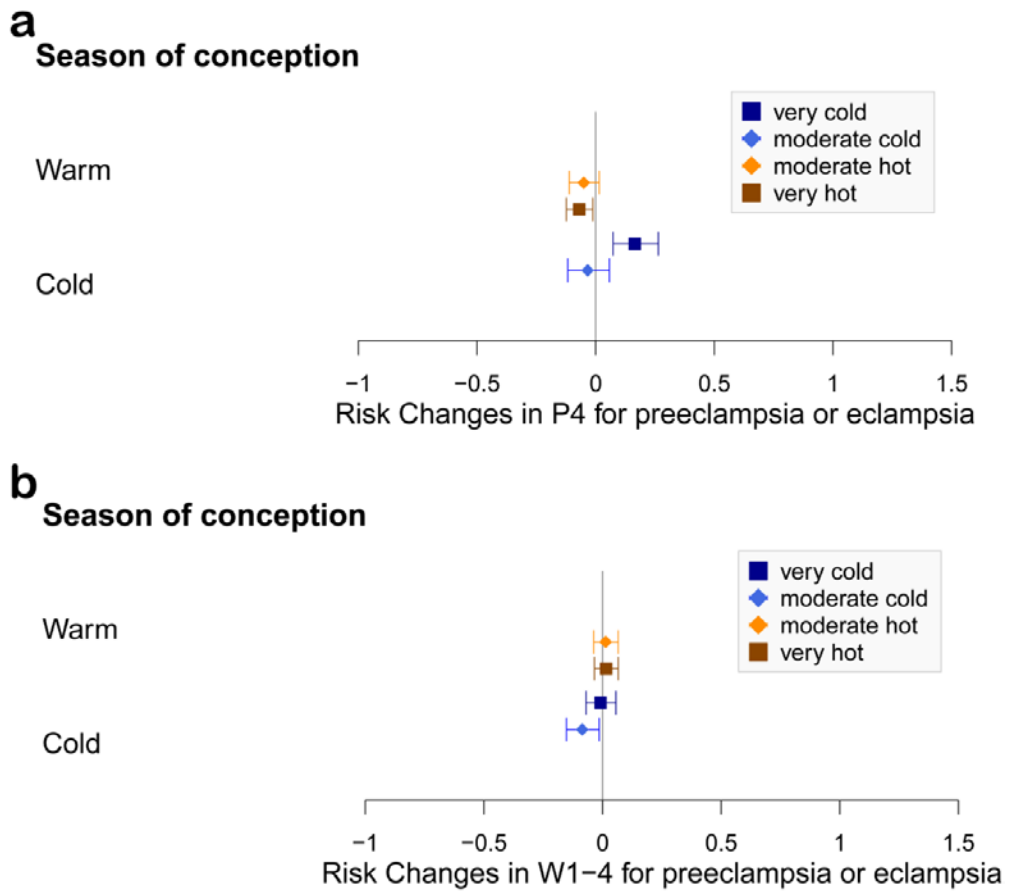

**Supplementary Fig. 11** Risk change in preeclampsia or eclampsia to extreme temperature by season of conception. **(a)** 4 weeks preconception; **(b)** 1-4 weeks postconception. Data are presented as change in aORs with 95% confidence intervals. Error bars correspond to 95% confidence intervals, centre for the error bars correspond to point estimates of change in aORs. Source data are provided as a Source Data file.

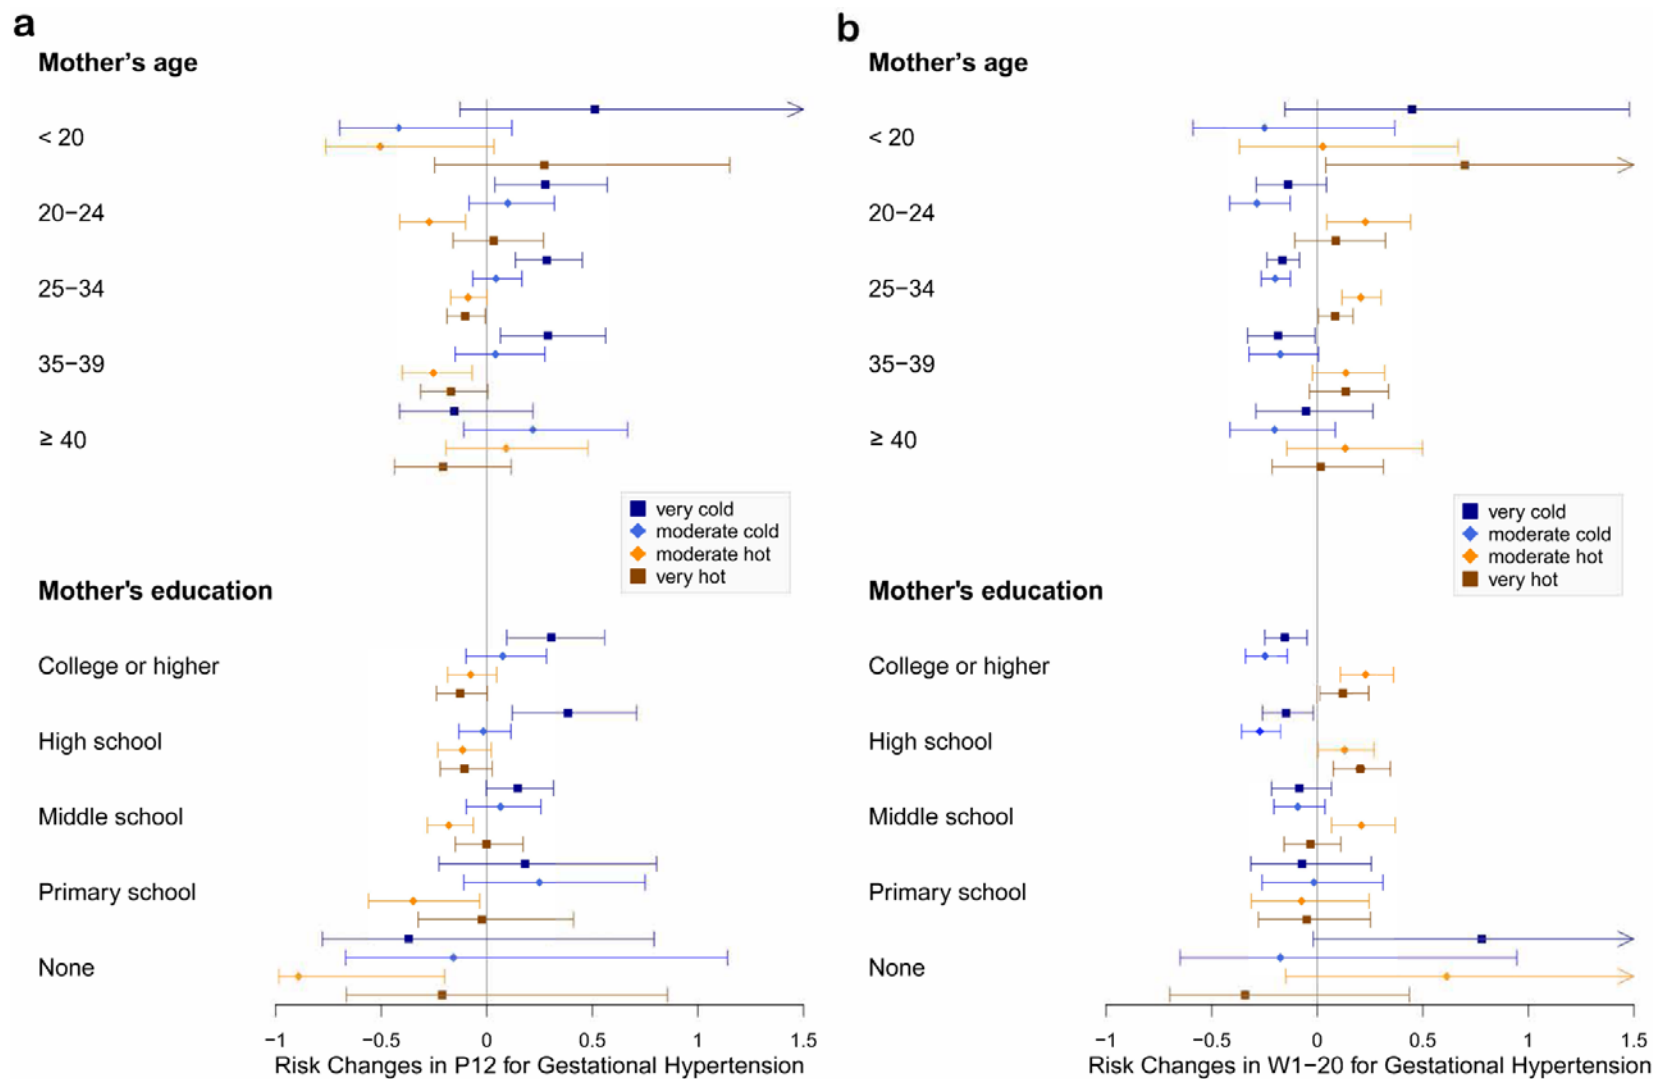

**Supplementary Fig. 12** Risk change in gestational hypertension to extreme temperature by maternal mother's age and education level. **(a)** 12 weeks preconception; **(b)** the first half of pregnancy. Data are presented as change in aORs with 95% confidence intervals. Error bars correspond to 95% confidence intervals, centre for the error bars correspond to point estimates of change in aORs. Source data are provided as a Source Data

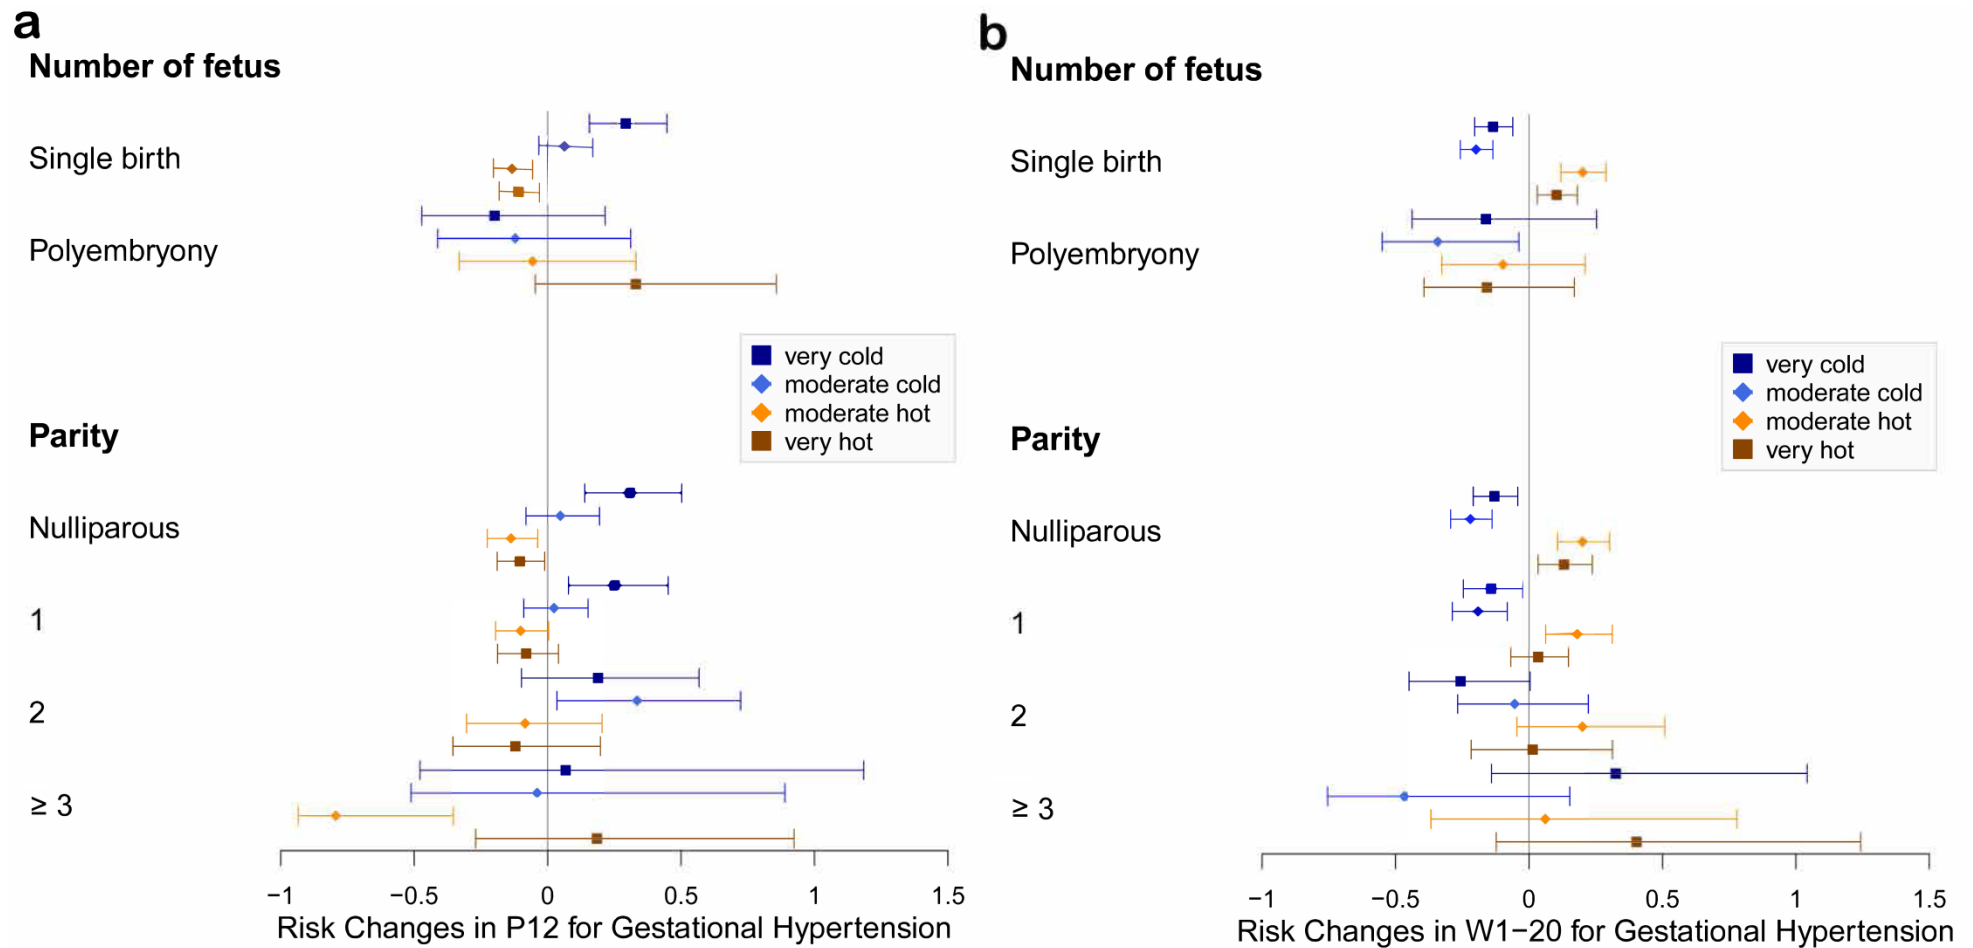

**Supplementary Fig. 13** Risk change in gestational hypertension to extreme temperature by number of fetuses and parity. **(a)** 12 weeks preconception; **(b)** the first half of pregnancy. Data are presented as change in aORs with 95% confidence intervals. Error bars correspond to 95% confidence intervals, centre for the error bars correspond to point estimates of change in aORs. Source data are provided as a Source Data file.

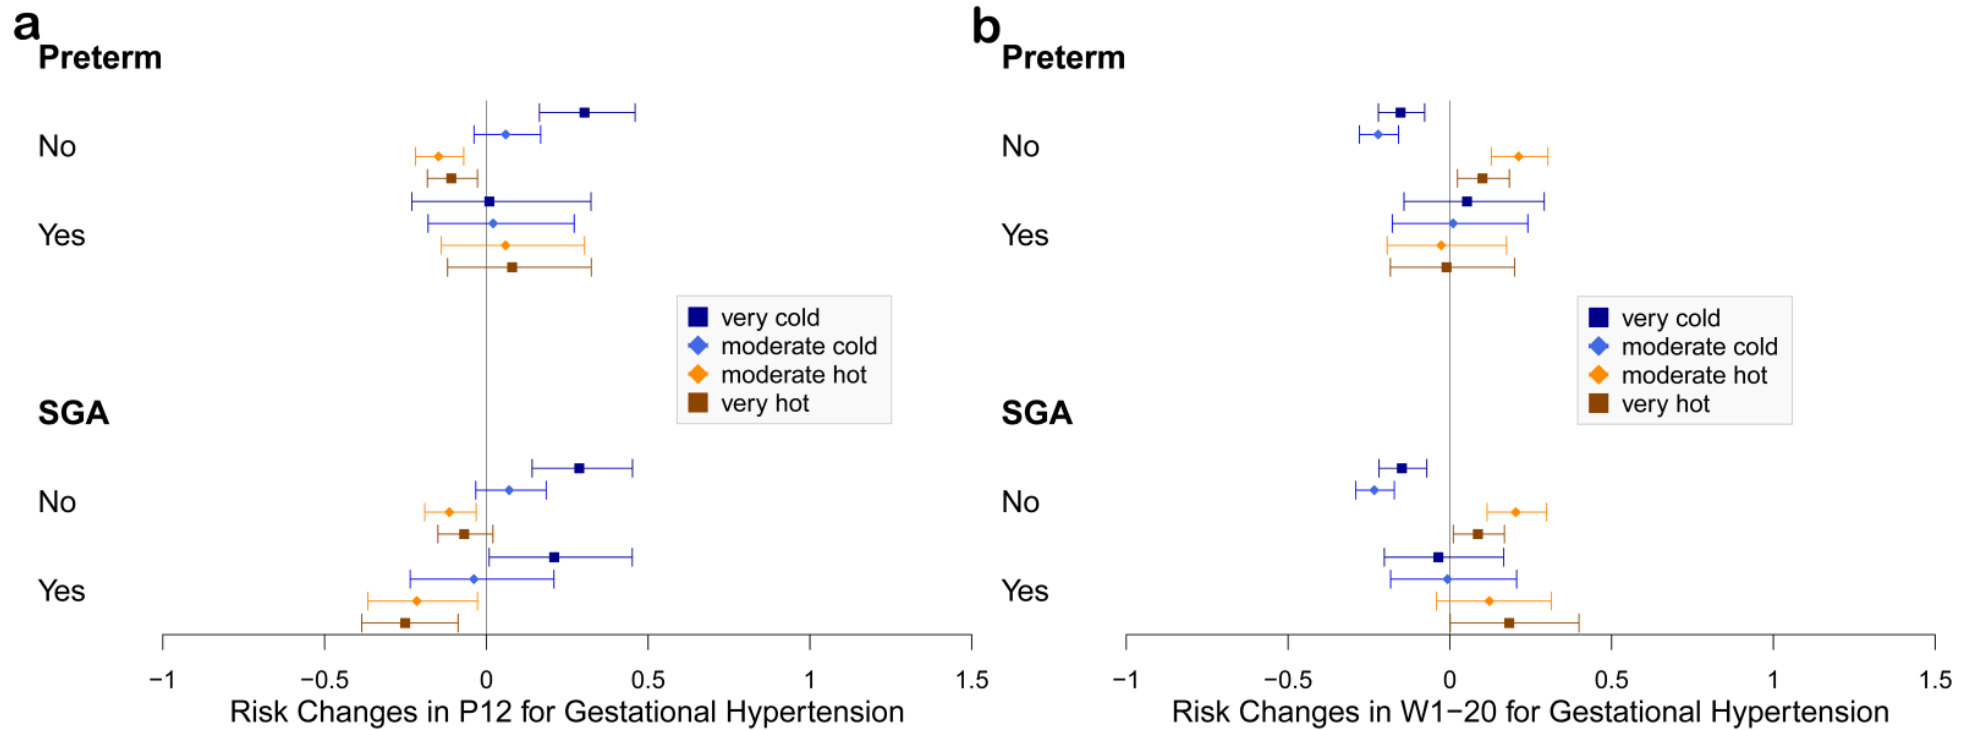

**Supplementary Fig. 14** Risk change in gestational hypertension to extreme temperature by preterm and small for gestational age infants. **(a)** 12 weeks preconception; **(b)** the first half of pregnancy. SGA: small for gestational age. Data are presented as change in aORs with 95% confidence intervals. Error bars correspond to 95% confidence intervals, centre for the error bars correspond to point estimates of change in aORs. Source data are provided as a Source Data file.

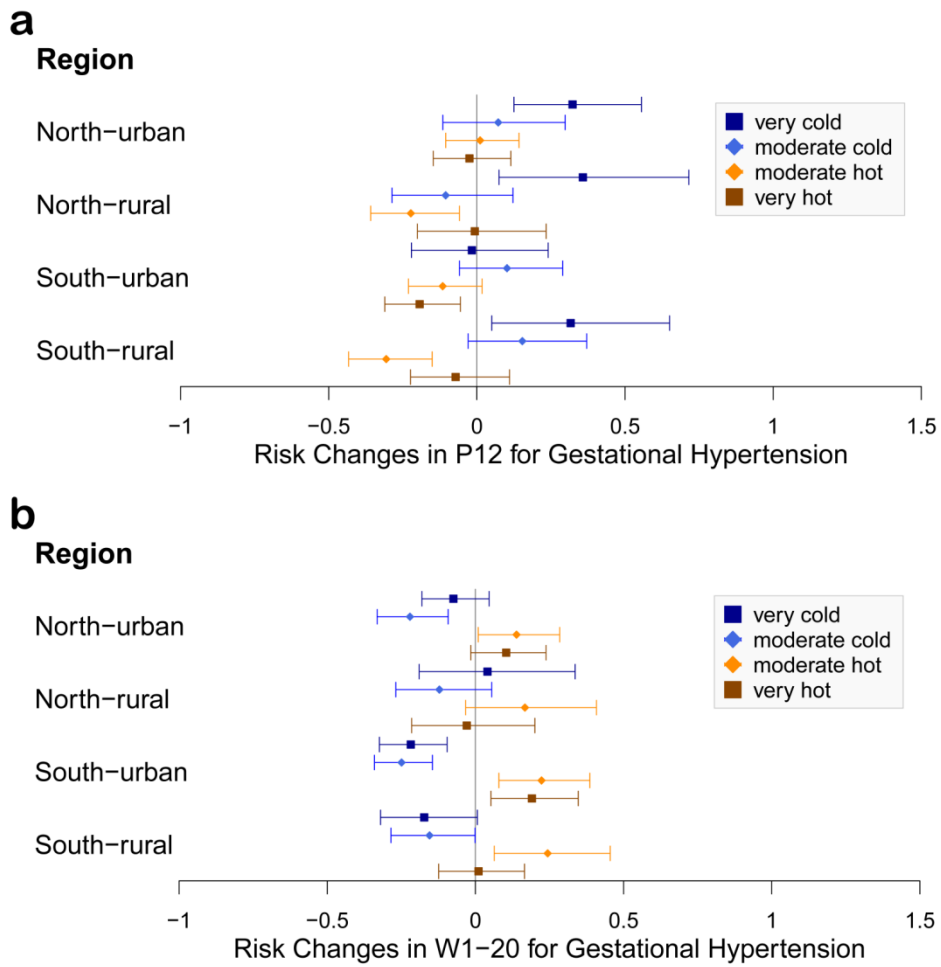

**Supplementary Fig. 15** Risk change in gestational hypertension to extreme temperature by region. **(a)** 12 weeks preconception; **(b)** the first half of pregnancy. Data are presented as change in aORs with 95% confidence intervals. Error bars correspond to 95% confidence intervals, centre for the error bars correspond to point estimates of change in aORs. Source data are provided as a Source Data file.



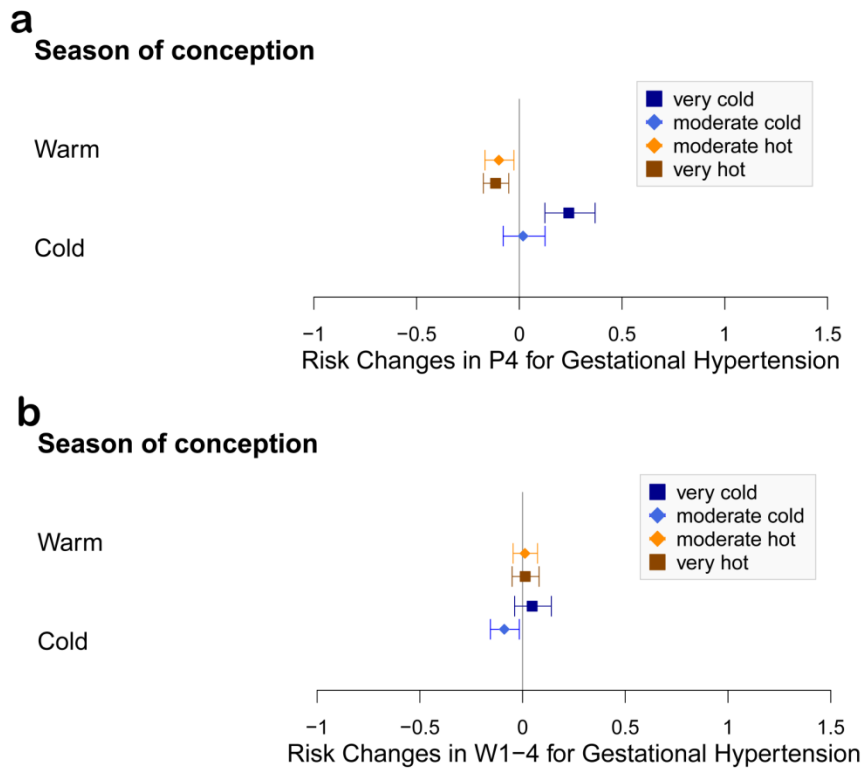

**Supplementary Fig. 16** Risk change in gestational hypertension to extreme temperature by season of conception. (a) 4 weeks preconception; (b) 1-4 weeks postconception. Data are presented as change in aORs with 95% confidence intervals. Error bars correspond to 95% confidence intervals, centre for the error bars correspond to point estimates of change in aORs. Source data are provided as a Source Data file.

**Supplementary Table 1** Stratified variables and covariates in subgroup analyses.

| <b>Stratified character</b>                                | <b>Covariates</b>                                                                                                                                                                                 |
|------------------------------------------------------------|---------------------------------------------------------------------------------------------------------------------------------------------------------------------------------------------------|
| Region(north-rural, north-urban, south-rural, south-urban) | region(west, central and east), hospital level, antenatal care visits, marital status, mother's education, mother's age, parity, number of fetus, elevation, humidity, and air pollution exposure |
| Mother's education                                         | hospital level, antenatal care visits, marital status, region(west, central and east), mother's age, parity, number of fetus, elevation, humidity, and air pollution exposure                     |
| Mother's age                                               | hospital level, antenatal care visits, marital status, region(west, central and east), mother's education, parity, number of fetus, elevation, humidity, and air pollution exposure               |
| Parity                                                     | hospital level, antenatal care visits, marital status, region(west, central and east), mother's education, mother's age, number of fetus, elevation, humidity, and air pollution exposure         |
| Number of fetus                                            | hospital level, antenatal care visits, marital status, region(west, central and east), mother's education, mother's age, parity, elevation, humidity, and air pollution exposure                  |
| Preterm                                                    | hospital level, antenatal care visits, marital status, region(west, central and east), mother's education, mother's age, parity, number of fetus, elevation, humidity, and air pollution exposure |
| Small for gestational age                                  | hospital level, antenatal care visits, marital status, region(west, central and east), mother's education, mother's age, parity, number of fetus, elevation, humidity, and air pollution exposure |
| Season of conception                                       | hospital level, antenatal care visits, marital status, region(west, central and east), mother's education, mother's age, parity, number of fetus, elevation, humidity, and air pollution exposure |
