# Supplementary material for: Association between ambient temperature and hypertensive disorders in pregnancy in China
Source: PubMed Central journal article supplement (PMC7286884; doi:10.1038/s41467-020-16775-8), 2020-06-10
Supplement: 41467_2020_16775_MOESM3_ESM.pdf [file 41467_2020_16775_MOESM3_ESM.pdf]

## **Description of Additional Supplementary Files**

File Name: Supplementary Software 1

Description: Codes used for the statistical models (including a Stata code file of RCS analysis for average temperature analysis, a SAS code file for extreme temperature analysis, a R code file for drawing forest plot of subgroup analysis results, and an introduction file of variables in original datasets).
